# Supplementary material for: Exploring Different Binders for a LiFePO4 Battery, Battery Testing, Modeling and Simulations
Source: MDPI journal article supplement (doi:10.3390/en15072332), 2022-03-23
Supplement: s1 [file s1]

# Exploring different binders for a $\text{LiFePO}_4$ battery, battery testing, modeling and simulations

Joseph Paul Baboo <sup>1,2</sup>, Mudasir A. Yattoo <sup>1</sup>, Matthew Dent <sup>1</sup>, Elaheh Hojaji Najafabadi <sup>1</sup>, Constantina Lekakou <sup>1,\*</sup>, Robert Slade <sup>2</sup>, Steven J. Hinder <sup>1</sup> and John F. Watts <sup>1</sup>

<sup>1</sup> Department of Mechanical Engineering Sciences, University of Surrey, Guildford GU2 7XH, UK; josefpaul@gmail.com (J.P.B.); muda.amu@gmail.com (M.A.Y.); m.j.dent@surrey.ac.uk (M.D.); e.hojajinajafabadi@surrey.ac.uk (E.H.N.); s.hinder@surrey.ac.uk (S.J.H.); j.watts@surrey.ac.uk (J.F.W.)

<sup>2</sup> Department of Chemistry, University of Surrey, Guildford GU2 7XH, UK; r.slade@surrey.ac.uk

\* Correspondence: c.lekakou@surrey.ac.uk

## Adhesion Tests Of Lfp Coatings With Different Binders

### A: cross-cuts of wet coatings

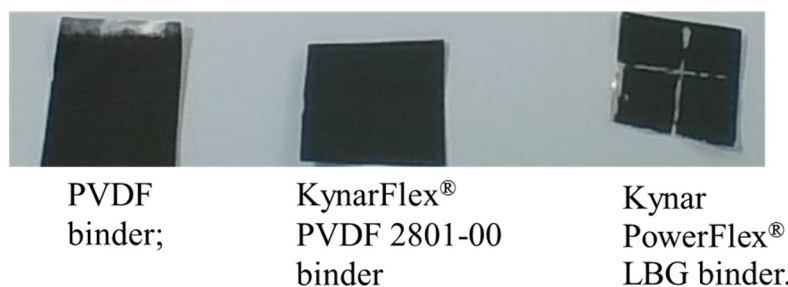

### B: Adhesive tape pull off

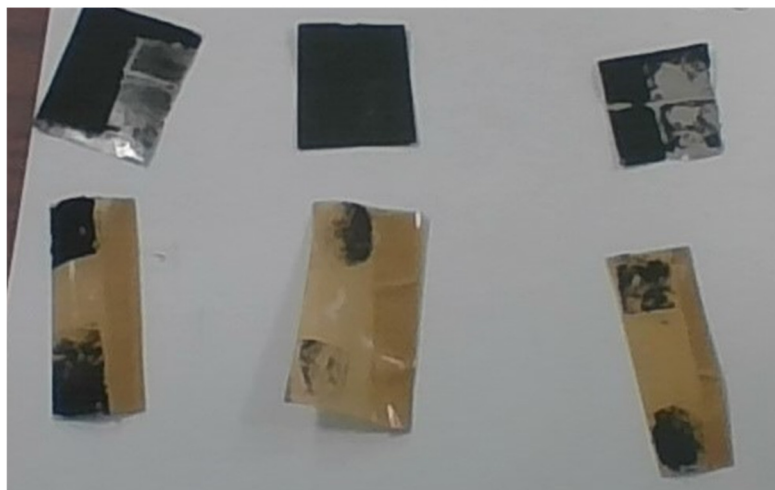

**Figure S1.** Results of wet adhesion test of some of the samples of LFP coatings with different types of binders: A: PVDF binder; B: KynarFlex® PVDF 2801-00 binder; C: Kynar PowerFlex® LBG binder.

## SEM:

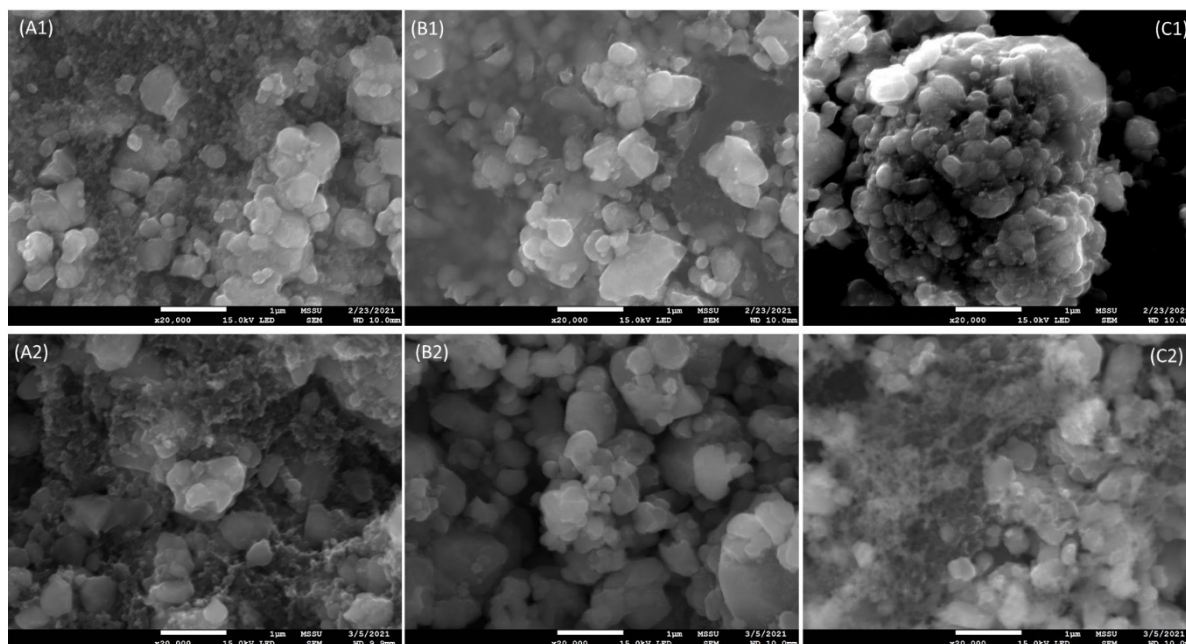

**Figure S2.** High magnification SEM micrographs of LFP coatings as prepared (second index: 1) and postmortem after 25 battery cell cycles (second index: 2). First index: A: PVDF binder; B: KynarFlex® PVDF 2801-00 binder; C: Kynar PowerFlex® LBG binder.

## XPS Binders:

## Quantification Data

|  | Name | Peak BE | FWHM eV | Area (P) CPS.eV | Atomic % | Q |
|--|------|---------|---------|-----------------|----------|---|
|  | C1s  | 286.4   | 1.45    | 327698.91       | 49.7     | Y |
|  | F1s  | 688.1   | 1.82    | 999759.55       | 50.1     | Y |
|  | O1s  | 532.7   | 3.45    | 3272.00         | 0.2      | Y |

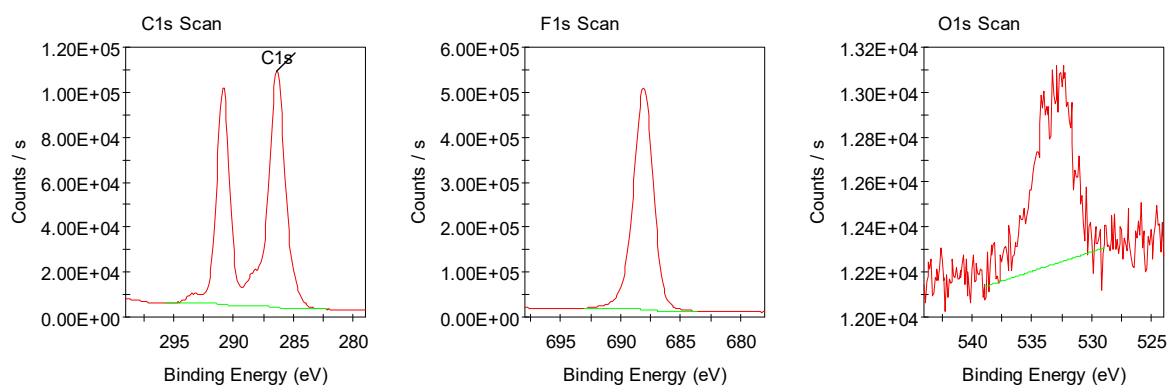

**Figure S3.** XPS data for the PVDF binder.

Quantification Data

|  | Name | Peak BE | FWHM eV | Area (P) CPS.eV | Atomic % | Q |
|--|------|---------|---------|-----------------|----------|---|
|  | C1s  | 286.4   | 1.49    | 238973.10       | 47.7     | Y |
|  | F1s  | 688.2   | 1.98    | 789223.72       | 52.0     | Y |
|  | O1s  | 533.8   | 2.59    | 3869.05         | 0.3      | Y |

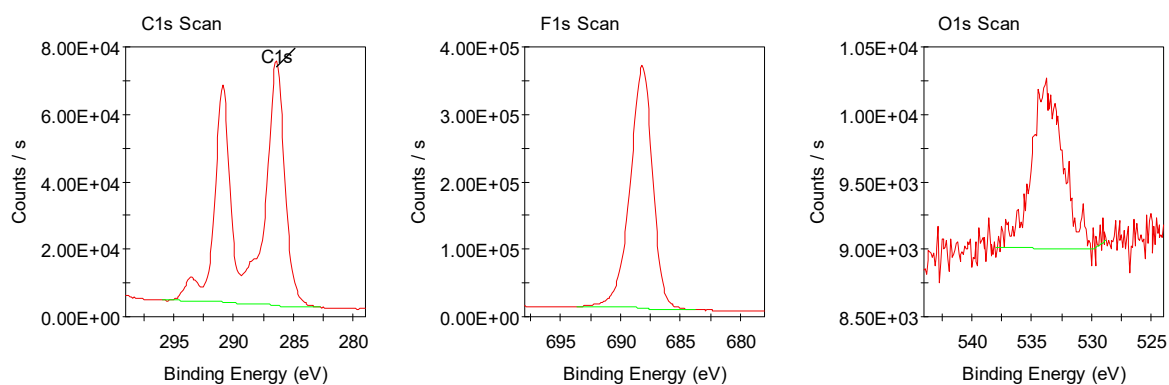

Figure S4. XPS data for the KynarFlex® PVDF 2801-00 binder.

Quantification Data

|  | Name | Peak BE | FWHM eV | Area (P) CPS.eV | Atomic % | Q |
|--|------|---------|---------|-----------------|----------|---|
|  | C1s  | 285.0   | 1.18    | 236061.46       | 53.2     | Y |
|  | F1s  | 688.5   | 2.05    | 179915.62       | 13.4     | Y |
|  | Fe3p | 55.8    | 3.75    | 24489.79        | 3.2      | Y |
|  | N1s  | 400.6   | 1.74    | 1884.35         | 0.3      | Y |
|  | O1s  | 532.1   | 1.53    | 252623.61       | 23.6     | Y |
|  | P2p  | 134.1   | 1.79    | 41284.83        | 6.3      | Y |

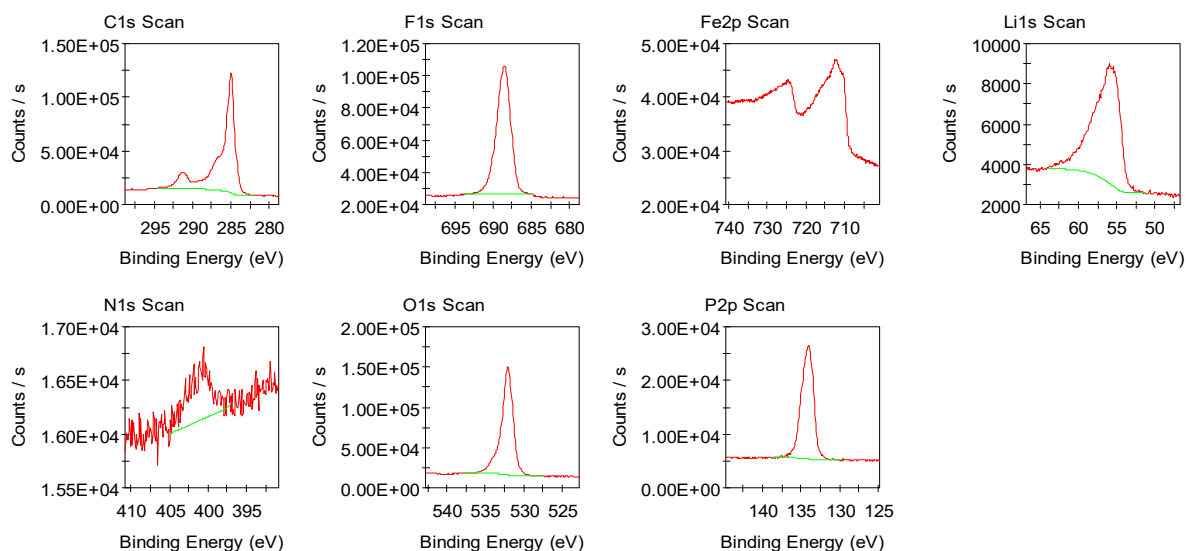

Figure S5. XPS data for the Kynar PowerFlex® LBG binder.

**Table S1.** XPS quantification data for coating of LFP with PVDF binder.

| <b>(a1) Coating as prepared</b> |      |         |         |                 |          |   | <b>(a2) Coating after 25 cycles - postmortem</b> |      |         |         |                 |          |   |
|---------------------------------|------|---------|---------|-----------------|----------|---|--------------------------------------------------|------|---------|---------|-----------------|----------|---|
|                                 | Name | Peak BE | FWHM eV | Area (P) CPS.eV | Atomic % | Q |                                                  | Name | Peak BE | FWHM eV | Area (P) CPS.eV | Atomic % | Q |
|                                 | C1s  | 285.0   | 1.06    | 312975.77       | 61.9     | Y |                                                  | C1s  | 285.0   | 1.59    | 203686.46       | 35.2     | Y |
|                                 | F1s  | 688.2   | 1.81    | 313087.31       | 20.5     | Y |                                                  | Cl2p | 198.7   | 1.31    | 2081.49         | 0.1      | Y |
|                                 | Fe3p | 55.9    | 4.01    | 14033.24        | 1.6      | Y |                                                  | F1s  | 687.9   | 1.91    | 65273.33        | 3.7      | Y |
|                                 | N1s  | 400.9   | 1.70    | 3591.58         | 0.5      | Y |                                                  | Li1s | 55.4    | 1.64    | 10799.67        | 26.7     | Y |
|                                 | O1s  | 532.1   | 1.55    | 150184.32       | 12.3     | Y |                                                  | N1s  | 400.3   | 1.53    | 2783.01         | 0.3      | Y |
|                                 | P2p  | 134.1   | 1.72    | 23716.13        | 3.2      | Y |                                                  | O1s  | 532.0   | 1.64    | 461722.85       | 33.0     | Y |
|                                 |      |         |         |                 |          |   |                                                  | P2p  | 133.6   | 1.98    | 7597.50         | 0.9      | Y |

**Table S2.** XPS quantification data for coating of LFP with KynarFlex® PVDF 2801-00 binder.

| <b>(b1) Coating as prepared</b> |      |         |         |                 |          |   | <b>(b2) Coating after 25 cycles - postmortem</b> |      |         |         |                 |          |   |
|---------------------------------|------|---------|---------|-----------------|----------|---|--------------------------------------------------|------|---------|---------|-----------------|----------|---|
|                                 | Name | Peak BE | FWHM eV | Area (P) CPS.eV | Atomic % | Q |                                                  | Name | Peak BE | FWHM eV | Area (P) CPS.eV | Atomic % | Q |
|                                 | C1s  | 285.3   | 1.98    | 200134.34       | 44.8     | Y |                                                  | C1s  | 285.0   | 1.48    | 174683.82       | 32.7     | Y |
|                                 | F1s  | 688.8   | 2.06    | 402245.90       | 29.8     | Y |                                                  | Cl2p | 198.8   | 1.45    | 3492.51         | 0.2      | Y |
|                                 | Fe3p | 55.7    | 3.54    | 18035.70        | 2.4      | Y |                                                  | F1s  | 687.7   | 1.97    | 78170.97        | 4.8      | Y |
|                                 | N1s  | 400.7   | 1.72    | 1290.24         | 0.2      | Y |                                                  | Li1s | 55.4    | 1.67    | 10823.98        | 29.0     | Y |
|                                 | O1s  | 532.0   | 1.53    | 194608.63       | 18.0     | Y |                                                  | N1s  | 400.1   | 1.29    | 1556.00         | 0.2      | Y |
|                                 | P2p  | 134.0   | 1.76    | 32238.24        | 4.9      | Y |                                                  | O1s  | 532.0   | 1.67    | 418805.38       | 32.4     | Y |
|                                 |      |         |         |                 |          |   |                                                  | P2p  | 133.7   | 1.95    | 5205.86         | 0.7      | Y |

**Table S3.** XPS quantification data for coating of LFP with Kynar PowerFlex® LBG binder.

| <b>(c1) Coating as prepared</b> |      |         |         |                 |          |   | <b>(c2) Coating after 25 cycles - postmortem</b> |      |         |         |                 |          |   |
|---------------------------------|------|---------|---------|-----------------|----------|---|--------------------------------------------------|------|---------|---------|-----------------|----------|---|
|                                 | Name | Peak BE | FWHM eV | Area (P) CPS.eV | Atomic % | Q |                                                  | Name | Peak BE | FWHM eV | Area (P) CPS.eV | Atomic % | Q |
|                                 | C1s  | 285.0   | 1.18    | 236061.46       | 53.2     | Y |                                                  | C1s  | 285.0   | 1.47    | 197332.68       | 31.1     | Y |
|                                 | F1s  | 688.5   | 2.05    | 179915.62       | 13.4     | Y |                                                  | Cl2p | 198.7   | 1.72    | 7735.25         | 0.4      | Y |
|                                 | Fe3p | 55.8    | 3.75    | 24489.79        | 3.2      | Y |                                                  | F1s  | 687.3   | 2.23    | 50981.44        | 2.7      | Y |
|                                 | N1s  | 400.6   | 1.74    | 1884.35         | 0.3      | Y |                                                  | Li1s | 55.4    | 1.63    | 12999.76        | 29.3     | Y |
|                                 | O1s  | 532.1   | 1.53    | 252623.61       | 23.6     | Y |                                                  | N1s  | 399.9   | 2.99    | 3136.59         | 0.3      | Y |
|                                 | P2p  | 134.1   | 1.79    | 41284.83        | 6.3      | Y |                                                  | O1s  | 531.9   | 1.67    | 546554.54       | 35.6     | Y |
|                                 |      |         |         |                 |          |   |                                                  | P2p  | 133.8   | 2.22    | 6374.25         | 0.7      | Y |

## Electrochemical Tests Of Graphite-Li Half Cell

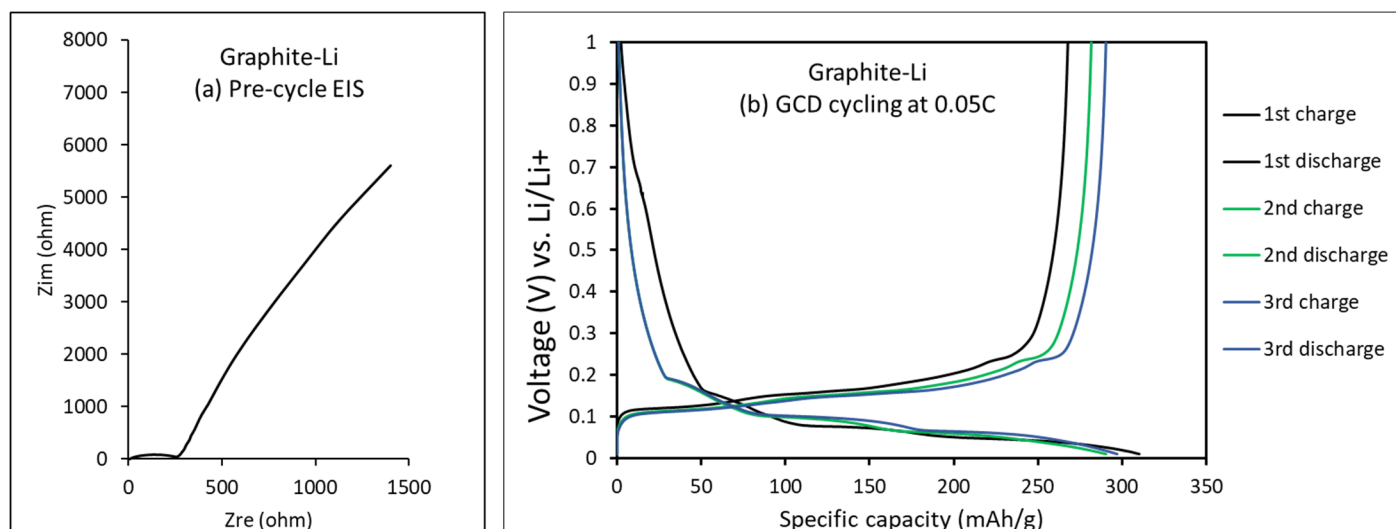

Figure S6. Nyquist plot from the EIS test and results of the GCD tests of graphite-Li half cells.

Table S4. Oxidation (charge) and reduction (discharge) plateau voltages from the GCD cycles of graphite -Li half cells.

| Oxidation (o) or<br>Reduction (r)<br>plateau voltages | 1 <sup>st</sup> Charge | 1 <sup>st</sup> Discharge | 2 <sup>nd</sup> Charge | 2 <sup>nd</sup> Discharge | 3 <sup>rd</sup> Charge | 3 <sup>rd</sup> Discharge |
|-------------------------------------------------------|------------------------|---------------------------|------------------------|---------------------------|------------------------|---------------------------|
| P <sub>o1</sub> , P <sub>r1</sub> (V)                 | 0.24                   | 0.14                      | 0.23                   | 0.17                      | 0.24                   | 0.17                      |
| P <sub>o2</sub> , P <sub>r2</sub> (V)                 | 0.16                   | 0.087                     | 0.15                   | 0.1                       | 0.15                   | 0.1                       |
| P <sub>o3</sub> , P <sub>r3</sub> (V)                 | 0.11                   | 0.05                      | 0.11                   | 0.06                      | 0.11                   | 0.055                     |

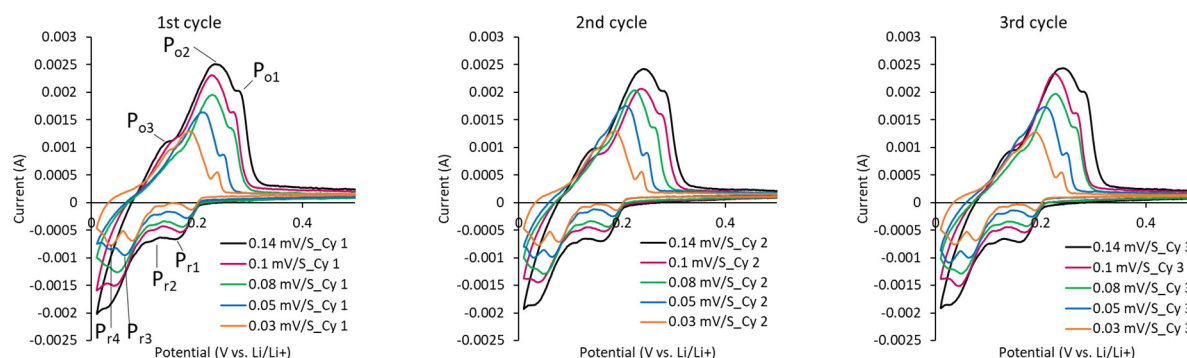

Figure S7. CV plots at different scan rates (3 cycles) of graphite-Li half cells, with the three oxidation peaks during charge and the 4 reduction peaks during discharge annotated on the first plot.

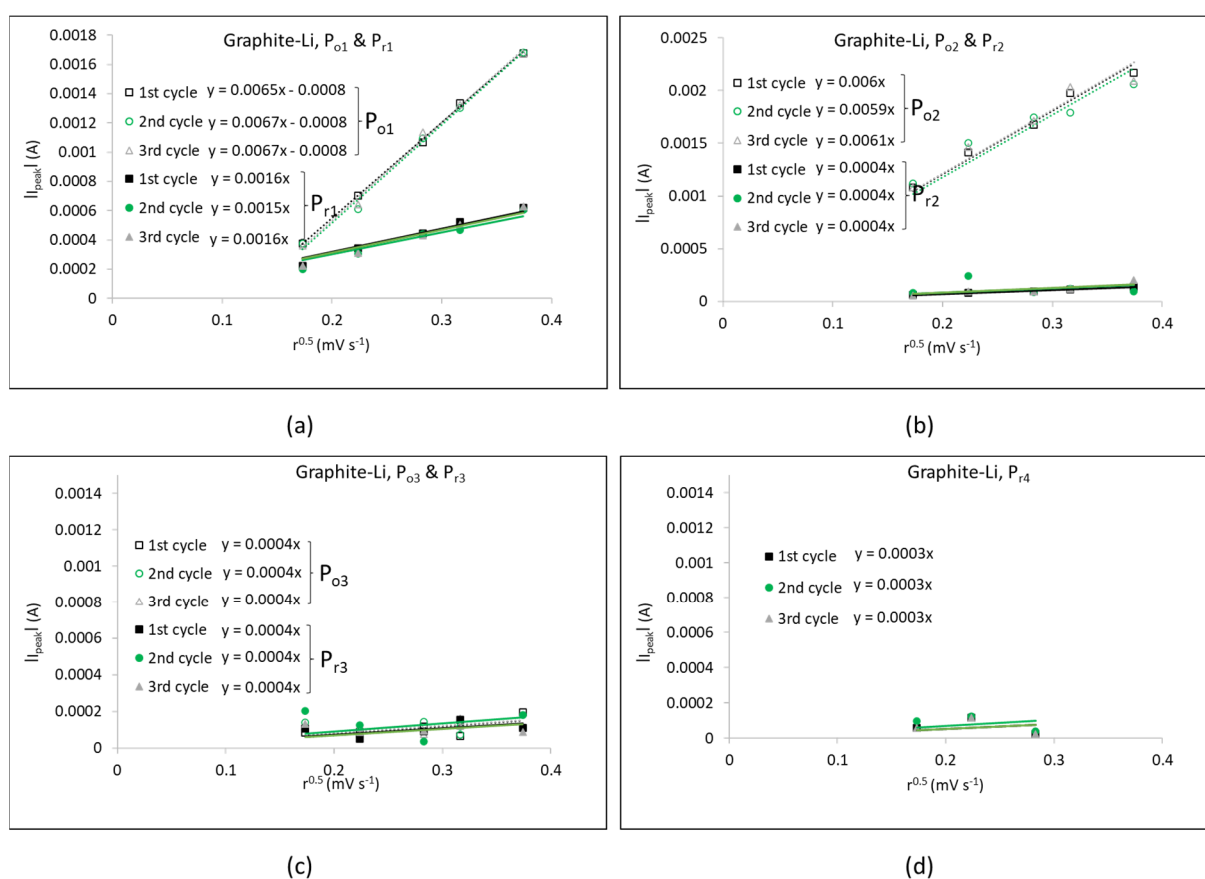

**Figure S8.** The linear fits of the Rendles-Shevchik equation for determining the  $\text{Li}^+$  ion diffusion coefficient in the graphite anode for the three oxidation peaks and the four reduction peaks of the CV plots in Figure S6.

**Table S5.** Diffusion coefficient of the  $\text{Li}^+$  ions in the graphite anode, determined using the Rendles-Shevchik equation and the gradient of the linear fits in Figure S7 (average of 3 cycles).

|                                                       | $P_{o1}$               | $P_{r1}$               | $P_{o2}$               | $P_{r2}$               | $P_{o3}$               | $P_{r3}$               | $P_{r4}$               |
|-------------------------------------------------------|------------------------|------------------------|------------------------|------------------------|------------------------|------------------------|------------------------|
| Diffusion coefficient ( $\text{cm}^2 \text{s}^{-1}$ ) | $3.29 \times 10^{-11}$ | $1.83 \times 10^{-12}$ | $2.69 \times 10^{-11}$ | $1.20 \times 10^{-11}$ | $1.20 \times 10^{-11}$ | $1.20 \times 10^{-11}$ | $6.73 \times 10^{-12}$ |

### Equivalent Electric Circuit Model (Eecm)

**Table S6.** Fitted parameters of the EECM against experimental EIS data, pre-cycling and after 5 GCD cycles of a graphite-LFP cell.

| EECM Parameter              | Pre-cycling                   | After 5 GCD cycles           |
|-----------------------------|-------------------------------|------------------------------|
| R1 (ohm)                    | 200                           | 10                           |
| R2 (ohm)                    | 73                            | 73                           |
| CPE1: Q1 ( $S s^{n1}$ ), n1 | $43.8 \times 10^{-6}$ , 0.765 | $17 \times 10^{-6}$ , 0.825  |
| R3 (ohm)                    | 367                           | 184                          |
| CPE2: Q2 ( $S s^{n2}$ ), n2 | $291 \times 10^{-6}$ , 0.8    | $66 \times 10^{-6}$ , 0.845  |
| R4 (ohm)                    | 52                            | 97                           |
| CPE3: Q3 ( $S s^{n3}$ ), n3 | $680 \times 10^{-6}$ , 0.757  | $89 \times 10^{-6}$ , 1      |
| CPE4: Q4 ( $S s^{n4}$ ), n4 | $724 \times 10^{-6}$ , 0.983  | $932 \times 10^{-6}$ , 0.260 |
| R5 (ohm)                    |                               | 11570                        |
| CPE5: Q5 ( $S s^{n5}$ ), n5 |                               | $583 \times 10^{-3}$ , 0.995 |
| CPE6: Q6 ( $S s^{n6}$ ), n6 |                               | $32 \times 10^{-6}$ , 0.726  |
| CPE7: Q7 ( $S s^{n7}$ ), n7 | $113 \times 10^{-3}$ , 0.300  | $113 \times 10^{-3}$ , 0.300 |

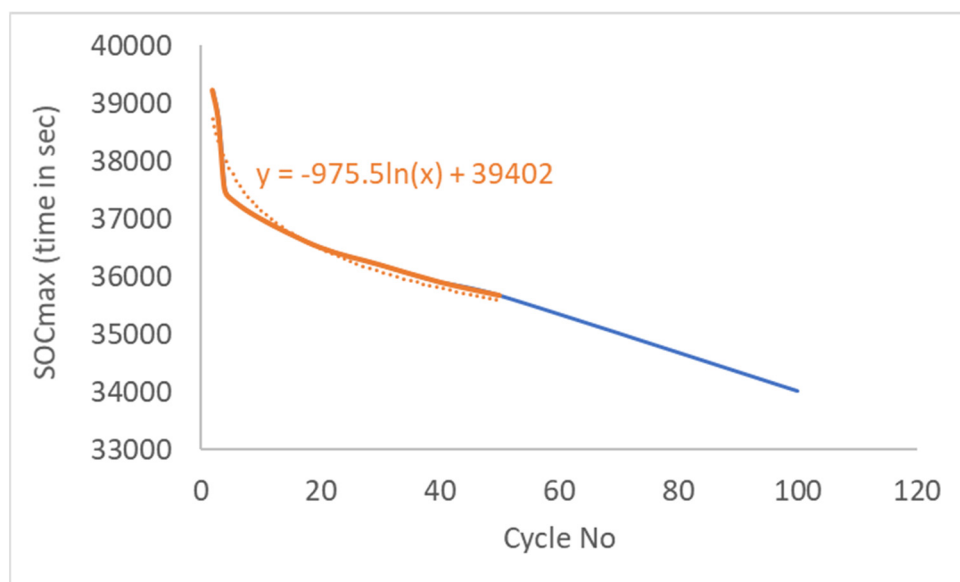

**Figure S9.** Experimental data of maximum SOC of graphite-LFP battery cell as a function of cycle number (orange solid line: up to 50 cycles, blue solid lines to 100 cycles) and fit of the experimental data up to 50 cycles (orange broken line with the equation displayed on the graph).
